# Supplementary material
Source: publisher figshare collection journal article supplement (https://gsajournals.figshare.com/ndownloader/files/20030198)
Supplement: Supplementary file 1 [file 20030198]

**Table S1. Regression analysis for predictors of scaffold NG50.**

| Predictor Variables | Model 1                  | Model 2                  |
|---------------------|--------------------------|--------------------------|
| Intercept           | 0.822<br>(0.768)         | 0.850<br>(0.745)         |
| COVERAGE            | 1.63e-03<br>(4.90e-03)   |                          |
| HETEROZYGOSITY      | -0.420 ***<br>(8.69e-02) | -0.413 ***<br>(8.17e-02) |
| REPEAT CONTENT      | -0.747 **<br>(0.242)     | -0.763 **<br>(0.231)     |
| Multiple $R^2$      | 0.76                     | 0.76                     |
| Adjusted $R^2$      | 0.72                     | 0.73                     |

N=21 for all models. Standard errors in parentheses.

.  $p \leq 0.10$ , \*  $p \leq 0.05$ , \*\*  $p \leq 0.01$ , \*\*\*  $p \leq 0.001$

Scaffold NG50 =  $\log_{10}(\text{Scaffold NG50})$

COVERAGE = total sequenced bases (after decontamination) / estimated genome size

HETEROZYGOSITY =  $\log_{10}(\text{frequency of variant branches in de Bruijn graph, } k=41)$

REPEAT CONTENT =  $\log_{10}(\text{frequency of repeat branches in de Bruijn graph, } k=41)$

Estimated genome sizes and the frequency of variant / repeat branches were calculated by SGA Preqc (Simpson 2014).

**Table S2. Regression analysis for predictors of the percentage of the estimated genome size that was assembled.**

| Predictor Variables | Model 1              | Model 2            |
|---------------------|----------------------|--------------------|
| Intercept           | 5.77<br>(25.5)       | 4.65<br>(24.8)     |
| COVERAGE            | -6.50e-02<br>(0.163) |                    |
| HETEROZYGOSITY      | 5.43 .<br>(2.89)     | 5.13 .<br>(2.72)   |
| REPEAT CONTENT      | -30.1 **<br>(8.04)   | -29.4 **<br>(7.69) |
| Multiple $R^2$      | 0.46                 | 0.45               |
| Adjusted $R^2$      | 0.36                 | 0.39               |

N=21 for all models. Standard errors in parentheses.

.  $p \leq 0.10$ , \*  $p \leq 0.05$ , \*\*  $p \leq 0.01$ , \*\*\*  $p \leq 0.001$

% of est. genome size assembled = (assembly length / estimated genome size) \* 100

COVERAGE = total sequenced bases (after decontamination) / estimated genome size

HETEROZYGOSITY =  $\log_{10}$ (frequency of variant branches in de Bruijn graph,  $k=41$ )

REPEAT CONTENT =  $\log_{10}$ (frequency of repeat branches in de Bruijn graph,  $k=41$ )

Estimated genome sizes and the frequency of variant / repeat branches were calculated by SGA Preqc (Simpson 2014).

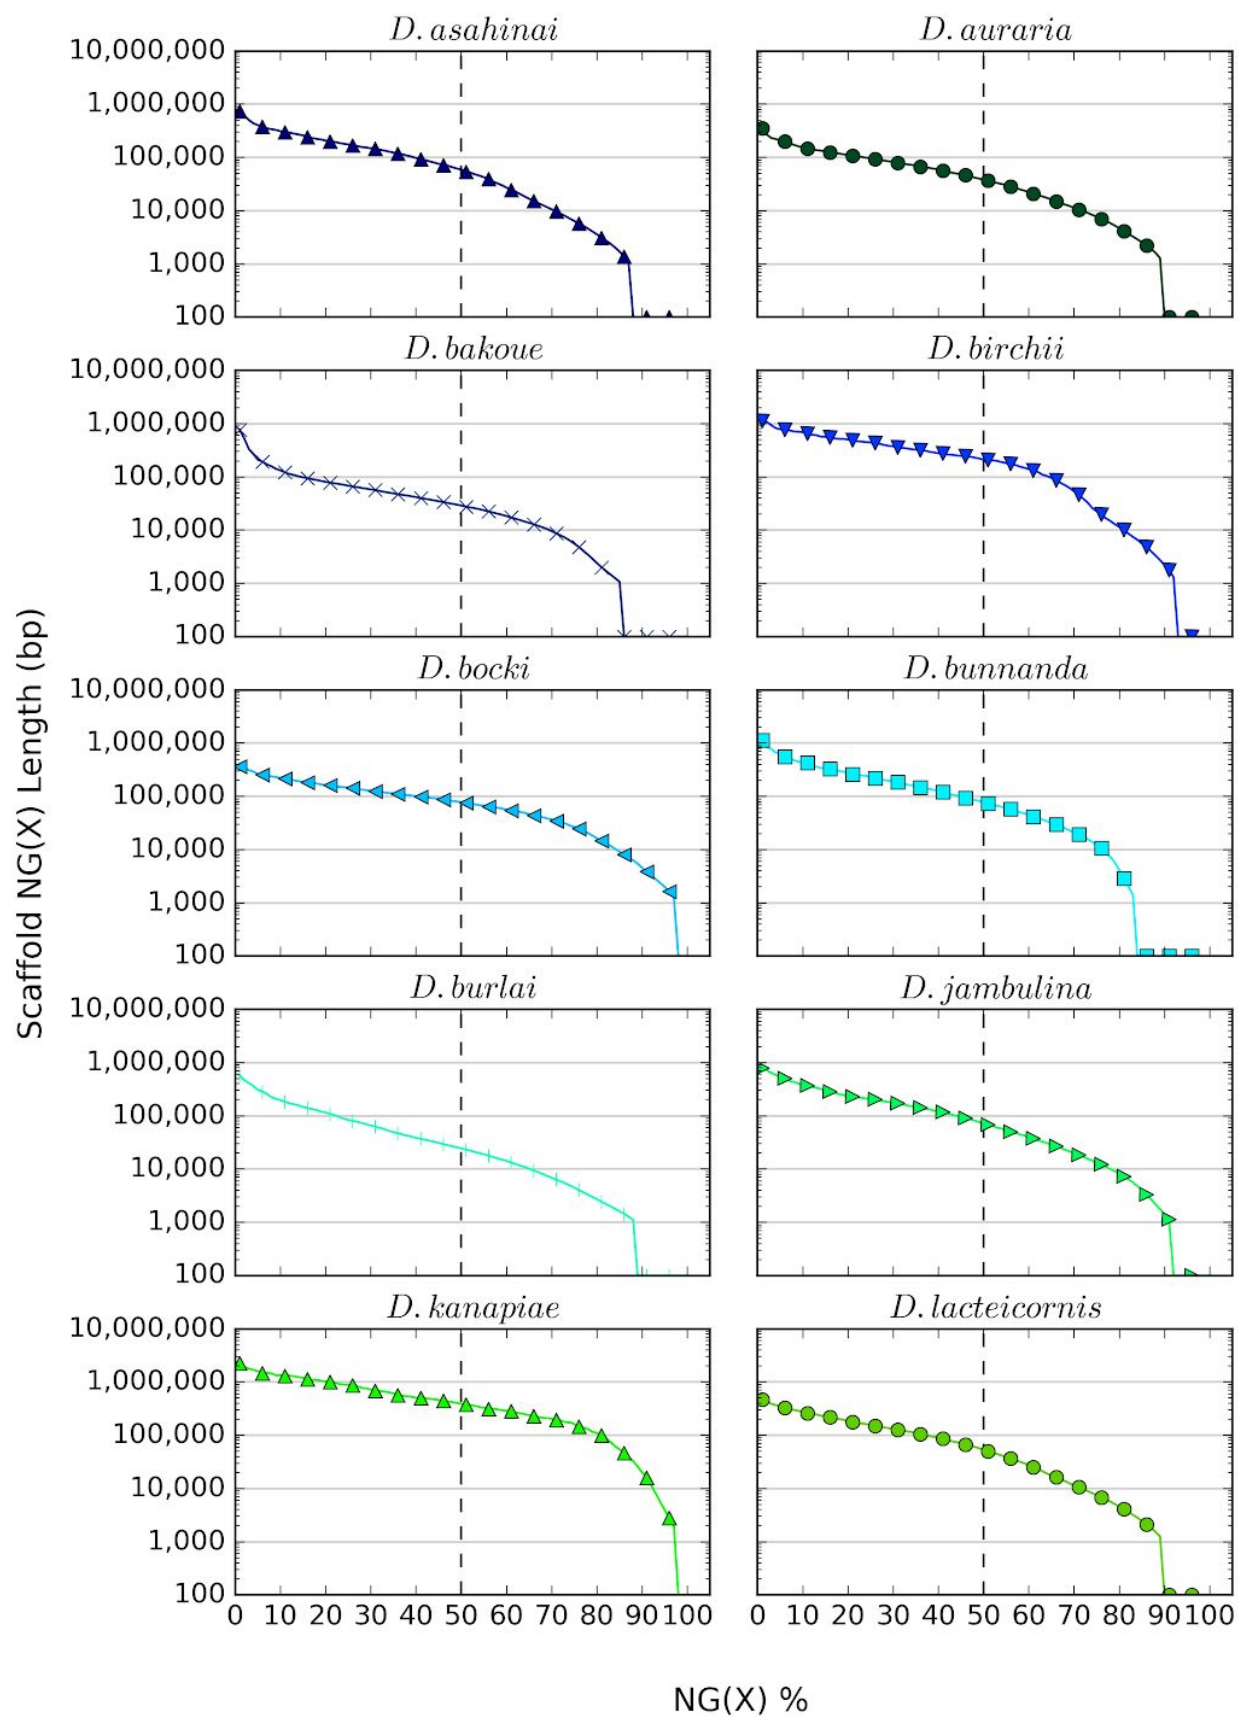

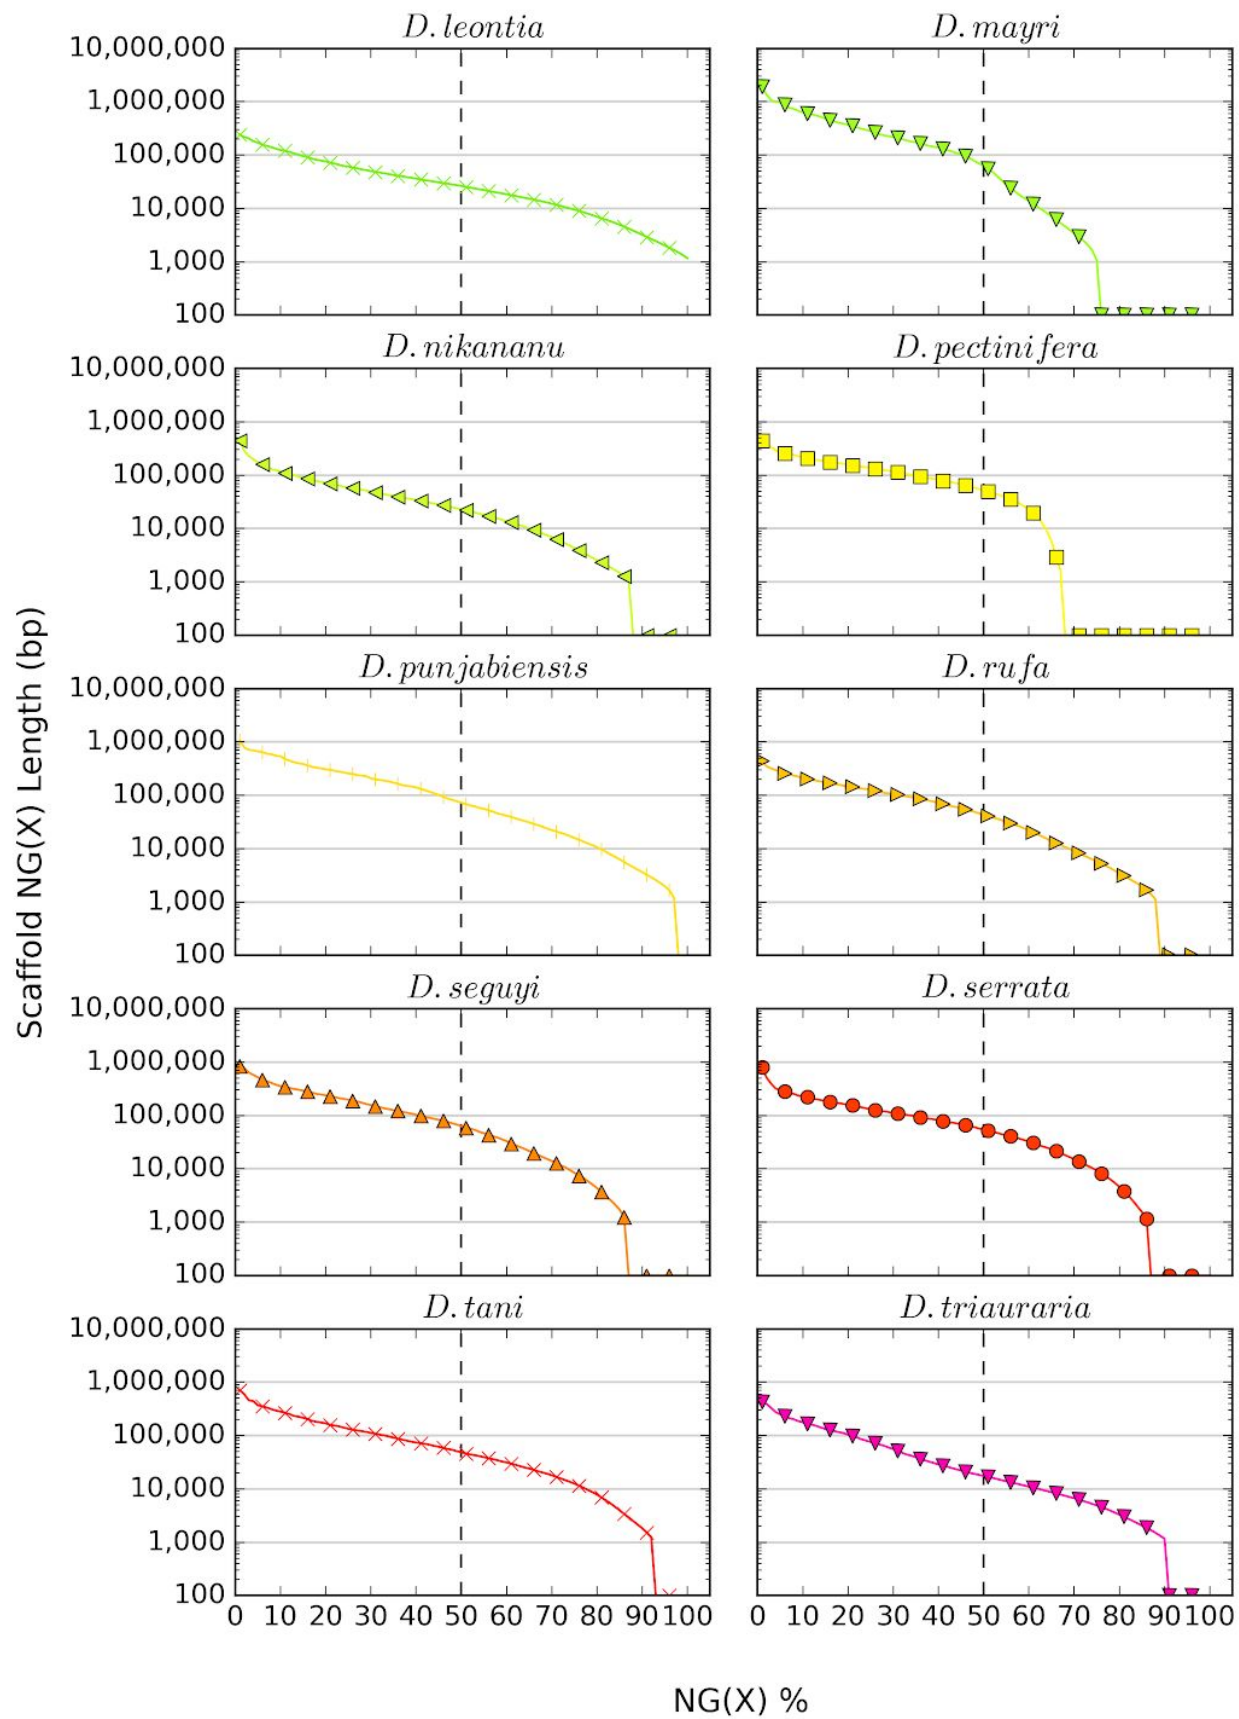

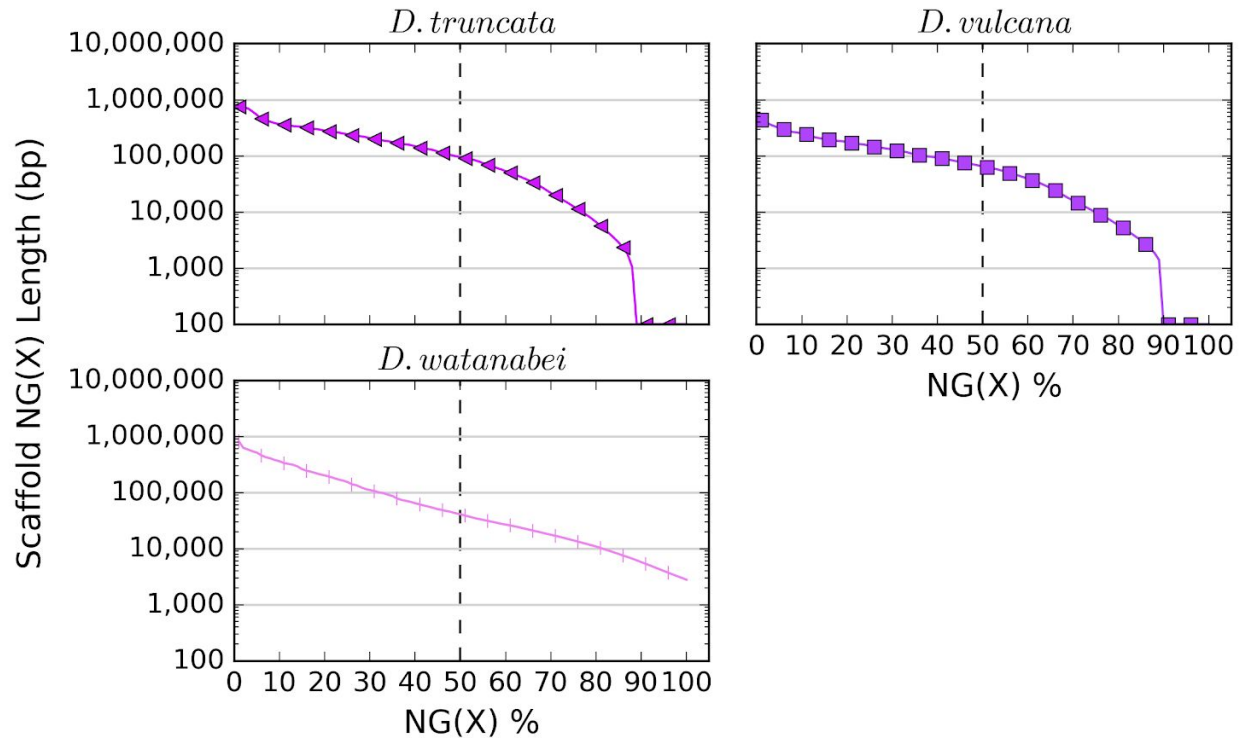

**Figure S1. NG graphs showing the distribution of scaffold lengths for 23 *montium* assemblies.**

To calculate the scaffold NG50 (Earl *et al.* 2011; Bradnam *et al.* 2013), scaffold lengths are ordered from longest to shortest and then summed, starting with the longest scaffold. The NG50 is the scaffold length that brings the sum above 50 % of the estimated genome size. When this calculation is repeated for all integers from 1 to 100, the result is an NG graph (Bradnam *et al.* 2013). NG graphs were constructed for each *montium* species using the corresponding genome size estimates from SGA Preqc (Simpson 2014). When a series intersects the x-axis, it means the total scaffold length is shorter than the estimated genome size. Similarly, if the series never touches the x-axis, then the assembly is longer than the estimated genome size. Due to filtering, the shortest scaffold present in any assembly is 1 kb.

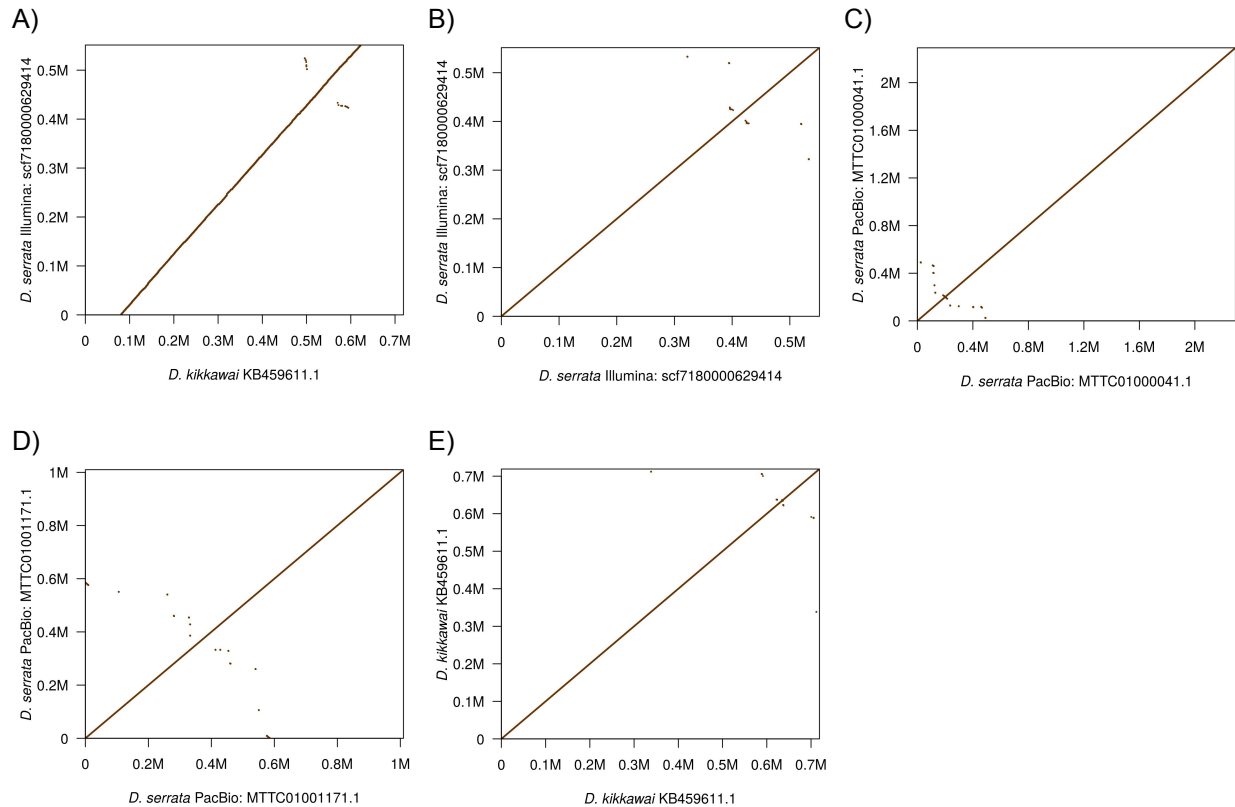

## Figure S2. Additional dotplots.

A) The alignment of the fifth longest scaffold (scf7180000629414) from our Illumina *D. serrata* assembly (strain 14028-0681.02) to the orthologous scaffold from the previously published *D. kikkawai* assembly (Chen *et al.* 2014). The alignment is highly collinear, and our scaffold aligns end-to-end within the longer *D. kikkawai* scaffold. B) The alignment of scf7180000629414 to itself. C) and D) The alignment of contigs MTTC01000041.1 and MTTC01001171.1 from the previously published *D. serrata* assembly (strain Fors4) (Allen *et al.* 2017) to themselves. Portions of these contigs aligned to scf7180000629414. E) The alignment of scaffold KB459611.1 from the *D. kikkawai* assembly (Chen *et al.* 2014) to itself. This is the same *D. kikkawai* scaffold from Part A). All pairwise alignments were generated by LASTZ (Harris 2007).

## **References**

Allen, S. L., E. K. Delaney, A. Kopp, and S. F. Chenoweth, 2017 Single-Molecule Sequencing of the *Drosophila serrata* Genome. *G3* 7: 781–788.

Bradnam, K. R., J. N. Fass, A. Alexandrov, P. Baranay, M. Bechner *et al.*, 2013 Assemblathon 2: evaluating de novo methods of genome assembly in three vertebrate species. *Gigascience* 2: 10.

Chen, Z. X., D. Sturgill, J. Qu, H. Jiang, S. Park *et al.*, 2014 Comparative validation of the *D. melanogaster* modENCODE transcriptome annotation. *Genome Res.* 24: 1209–1223.

Earl, D., K. Bradnam, J. St John, A. Darling, D. Lin *et al.*, 2011 Assemblathon 1: a competitive assessment of de novo short read assembly methods. *Genome Res.* 21: 2224–2241.

Harris, R. S., 2007 Improved pairwise alignment of genomic DNA [Ph.D.]: The Pennsylvania State University.

Simpson, J. T., 2014 Exploring genome characteristics and sequence quality without a reference. *Bioinformatics* 30: 1228–1235.
